# Supplementary material for: Beryllium and Other Trace Elements in Paragneisses and Anatectic Veins of the Ultrahigh-Temperature Napier Complex, Enderby Land, East Antarctica: the Role of Sapphirine
Source: Oxford University Press journal article supplement (doi:10.1093/petrology/egi098), 2006-01-13
Supplement: egi098_Supplementary_Data.zip [file egi098_Supplementary_Data.zip]

Archive with 8 entries (8 files):
- BRF_019_Appendix_3.xls
- BRF_019_Appendix_4.xls
- BRF_019_Appendix_6.xls
- E_Appendix_8.xls
- BRF_019_Appendix_2.xls
- BRF_019_Appendix_7.xls
- BRF_019___Appendix_1.pdf
- BRF_019_Appendix_5.xls
