# Supplementary material for: Beryllium and Other Trace Elements in Paragneisses and Anatectic Veins of the Ultrahigh-Temperature Napier Complex, Enderby Land, East Antarctica: the Role of Sapphirine
Source: Oxford University Press journal article supplement (doi:10.1093/petrology/egi098), 2006-01-13
Supplement: egi098_Supplementary_Data.zip [file egi098_Supplementary_Data.zip › BRF_019_Appendix_2.xls]

## Sheet: Appendix 2
Appendix 2. Selected analyses of orthopyroxene
Locality	C. Pt.	C. Pt.	C. Pt.	C. Pt.	C. Pt.	C. Pt.	C. Pt.	C. Pt.	C. Pt.	Mt. P.	Mt. P.	Mt. P.	Mt. P.	Mt. P.	Mc. I.
Rock	P	P	P	P	P	P	P	P	P	P	P	P	P	P	V
Sample	R31238	R31238	R31238	2292J	2292J	2292J	2292M	2292M	2292M	cc6	10503	10503	10504	10504	R25628
Texture	core	rim	2nd	core	rim	2nd	core	rim	2nd	core	core	2nd	core	rim	2nd
Wt%
SiO2	52.82	52.74	53.54	50.97	51.33	51.64	51.86	52.66	52.8	51.77	49.8	51.84	49.41	52.14	49.87
TiO2	0.07	0.08	0.03	0.09	0.03	0.08	0.11	0.06	0.04	0.08	0.12	0.13	0.07	0.06	0.15
Al2O3	7.85	6.91	6.11	8.13	7.54	6.78	7.75	6.25	6.26	7.3	9.55	6.52	10.75	6.58	7.75
Cr2O3	0	0	0	0	0	0	0	0	0	0.03	0.03	0	0	0.03	0.24
FeO	10.82	10.66	10.78	14.1	14.13	14.99	11.42	11.26	11.16	14	15.23	14.89	14.18	14.44	17.76
MnO	0.04	0.06	0.04	0.05	0	0.06	0.08	0.1	0.05	0.19	0.17	0.18	0.18	0.16	0.05
MgO	28.83	29.26	29.62	26.5	26.86	26.31	28.86	29.39	29.37	26.96	24.52	25.93	24.08	26.41	23.64
CaO	0.06	0.06	0.06	0.03	0.03	0.05	0.07	0.07	0.07	0.05	0.03	0.04	0.04	0.03	0.11
Na2O	0	0	0	0	0.02	0	0.01	0	0	0	0.01	0	0	0	0.02
Sum	100.5	99.77	100.19	99.86	99.94	99.92	100.17	99.79	99.75	100.39	99.46	99.52	98.72	99.85	99.59
ppm
Be	15.3	13.5	9.2	9.2*	—	7.9	14.0*	12.4	9.6*	1.7	—	0.1	—	—	0.4
Formulae per 6 O
Si	1.845	1.856	1.876	1.822	1.834	1.853	1.827	1.86	1.864	1.841	1.798	1.866	1.787	1.866	1.822
Ti	0.002	0.002	0.001	0.002	0.001	0.002	0.003	0.002	0.001	0.002	0.003	0.003	0.002	0.002	0.004
Al	0.323	0.286	0.252	0.343	0.318	0.286	0.322	0.26	0.261	0.306	0.407	0.277	0.458	0.278	0.334
Cr	0	0	0	0	0	0	0	0	0	0.001	0.001	0	0	0.001	0.007
Fe	0.316	0.314	0.316	0.422	0.422	0.45	0.337	0.333	0.329	0.416	0.46	0.448	0.429	0.432	0.543
Mn	0.001	0.002	0.001	0.001	0	0.002	0.002	0.003	0.001	0.006	0.005	0.005	0.006	0.005	0.002
Mg	1.501	1.535	1.547	1.412	1.43	1.407	1.515	1.548	1.546	1.429	1.32	1.391	1.298	1.409	1.288
Ca	0.002	0.002	0.002	0.001	0.001	0.002	0.002	0.002	0.003	0.002	0.001	0.001	0.001	0.001	0.004
Na	0	0	0	0	0.001	0	0.001	0	0	0	0.001	0	0	0	0.001
Sum	3.991	3.998	3.997	4.004	4.007	4.002	4.009	4.008	4.005	4.003	3.996	3.992	3.982	3.993	4.004
XMg	0.826	0.83	0.83	0.77	0.772	0.758	0.818	0.823	0.824	0.774	0.742	0.756	0.752	0.765	0.704
Note: Localities: C. Pt. – Christmas Point, Z. Pt. – Zircon Point, Mc. I. – McIntyre Island,
Mt. P. – Mount Pardoe. P – quartz-rich paragneiss; V – interboudin pocket. All Fe as FeO.
XMg = atom Mg/(Mg + Fe). *Average of two or more measurements. K2O below detection, rarely 0.01 wt%
