# Supplementary material for: Beryllium and Other Trace Elements in Paragneisses and Anatectic Veins of the Ultrahigh-Temperature Napier Complex, Enderby Land, East Antarctica: the Role of Sapphirine
Source: Oxford University Press journal article supplement (doi:10.1093/petrology/egi098), 2006-01-13
Supplement: egi098_Supplementary_Data.zip [file egi098_Supplementary_Data.zip › BRF_019_Appendix_3.xls]

## Sheet: Appendix 3
Appendix 3. Selected analyses of garnet
Locality	C. Pt.	C. Pt.	C. Pt.	C. Pt.	C. Pt.	C. Pt.	Z. Pt.	Z. Pt.	Z. Pt.	Mt. P.	Mt. P.	Mt. P.	Mc. I.	Mc. I.
Rock	P	P	P	P	P	P	P	P	P	P	P	P	P	V
Sample	2292F	2292F	2292F	2292J	2292J	2292J	2234A1	2234A3	2234E	10504	10504	10504	R25628	R25628
Texture	core	rim	2nd	core	rim	2nd	core	core	core	core	rim	2nd	core	2nd
wt%
SiO2	40.57	40.61	39.98	40.25	40.33	39.99	38.8	39.02	40.11	40.35	40.68	40.85	38.88	39.682
TiO2	0.02	0	0.02	0	0	0	0.01	0	0	0	0.02	0.01	0	0
Al2O3	23.12	23.22	22.7	23.28	23.13	22.53	21.91	21.95	23.34	23.08	22.93	22.89	21.93	22.618
FeO	19.04	18.92	22.16	18.85	18.45	23.11	22.82	21.7	21	18.86	18.96	18.92	25.84	25.884
MnO	0.1	0.1	0.02	0.18	0.17	0.28	0.31	0.28	0.2	0.68	0.75	0.72	0.28	0.262
MgO	16.42	16.48	14.43	16.41	16.4	13.05	13.56	14.12	15.35	15.75	15.92	16.01	12.42	12.342
CaO	1.34	1.34	1.26	0.86	0.92	1.15	1.66	2.17	0.22	0.5	0.45	0.46	0.67	0.568
Na2O	0	0	0	0	0.02	0	0	0.01	0	0.01	0.02	0.01	0.03	0
Y2O3	0.26	0.1	0	0.76	0.6	0.22	0.22	0.07	0.77	0.59	0.35	0.29	0.21	0.024
Sum	100.87	100.76	100.57	100.59	100.03	100.33	99.29	99.33	100.99	99.81	100.08	100.16	100.25	101.38
ppm
Be	—	—	—	—	—	—	0.05	0.06	0.6	—	—	—	—	0.2
Formulae per 12 O
Si	2.965	2.967	2.97	2.953	2.968	2.995	2.949	2.951	2.954	2.983	2.996	3.004	2.957	2.9716
Ti	0	0	0.001	0	0	0	0.001	0	0	0	0.001	0.001	0	0
Al	1.992	1.999	1.988	2.013	2.006	1.988	1.963	1.957	2.026	2.011	1.99	1.983	1.965	1.99621
Fe	1.164	1.156	1.376	1.156	1.136	1.447	1.45	1.372	1.293	1.166	1.168	1.163	1.643	1.62105
Mn	0.006	0.006	0.001	0.011	0.01	0.018	0.02	0.018	0.012	0.042	0.047	0.045	0.018	0.0166182
Mg	1.789	1.795	1.598	1.795	1.8	1.457	1.537	1.592	1.685	1.735	1.748	1.754	1.408	1.37781
Ca	0.105	0.105	0.101	0.067	0.073	0.092	0.135	0.176	0.018	0.039	0.036	0.036	0.055	0.0455741
Na	0	0	0	0	0.003	0	0	0.002	0	0.002	0.003	0.002	0.004	0
Y	0.01	0.004	0	0.03	0.023	0.009	0.009	0.003	0.03	0.023	0.014	0.011	0.008	0.000956436
Sum	8.033	8.031	8.035	8.026	8.019	8.006	8.064	8.07	8.018	8.001	8.002	7.999	8.058	8.02982
XMg	0.606	0.608	0.537	0.608	0.613	0.502	0.515	0.537	0.566	0.598	0.599	0.601	0.461	0.459446
Note: Localities: C. Pt. – Christmas Point, Z. Pt. – Zircon Point, Mc. I. – McIntyre Island, Mt. P. – Mount Pardoe.
P – paragneiss; V – interboudin pocket. All Fe as FeO. K2O below detection, rarely up to 0.02 wt%, XMg = atom Mg/(Mg + Fe)
