# Supplementary material for: Beryllium and Other Trace Elements in Paragneisses and Anatectic Veins of the Ultrahigh-Temperature Napier Complex, Enderby Land, East Antarctica: the Role of Sapphirine
Source: Oxford University Press journal article supplement (doi:10.1093/petrology/egi098), 2006-01-13
Supplement: egi098_Supplementary_Data.zip [file egi098_Supplementary_Data.zip › BRF_019_Appendix_4.xls]

## Sheet: Appendix 4
Appendix 4. Selected analyses of feldspar
Locality	C. Pt.	C. Pt.	C. Pt.	Z. Pt.	Z. Pt.	Z. Pt.	Z. Pt.	Mt. P.	Mt. P.	Mt. P.	Mt. P.	Mt. P.
Sample	R31238	2292L	2292L	2234A1	2234A3	2234B	2234E	CC6	10503	10503	10514	10514
Rock	P	P	P	P	P	P	P	P	P	P	V	V
Mineral	Kfs	Kfs	Pl	Kfs	Pl	Pl	Kfs	Pl	Kfs*	Pl	Kfs	Pl
Wt%
SiO2	64.62	64.26	59.79	65.69	53.32	53.74	65.82	63.04	64.74	66.33	64.5903	64.4788
Al2O3	18.568	18.81	25.32	18.8	29.68	29.22	18.15	22.84	18.51	21.45	18.7615	22.3181
FeO	0.01	0.03	0	0.02	0.02	0	0	0.1	0.05	0.08	0	0
Na2O	1.238	1.2	7.66	1.35	4.53	4.99	0.82	8.98	1.22	9.91	0.765633	9.77062
K2O	14.406	14.37	0.14	14.62	0.15	0.15	15.38	0.42	14.62	0.11	15.7307	0.12508
CaO	0.036	0.04	6.81	0.13	12.37	11.29	0	3.98	0.02	3.07	0.0403333	3.61012
BaO	0.798	1.6	0	0.08	0.01	0	0	0	0.69	0	0.213367	0
Sum	99.678	100.31	99.72	100.69	100.08	99.4	100.17	99.36	99.85	100.95	100.102	100.303
ppm
Be	―	0.2	11	0.3	19	42	0.2	0.6	―	―	0.5	6
Formulae per 8 O
Si	2.99139	2.975	2.67	2.995	2.412	2.44	3.02	2.805	2.993	2.89	2.9825	2.83684
Al	1.01304	1.026	1.332	1.01	1.582	1.564	0.982	1.198	1.009	1.101	1.02103	1.15726
Fe	0.000290359	0.001	0	0.001	0.001	0	0	0.002	0.002	0.003	0	0
Na	0.111115	0.107	0.663	0.119	0.397	0.439	0.073	0.775	0.109	0.837	0.0685458	0.833465
K	0.850761	0.849	0.008	0.85	0.008	0.009	0.901	0.024	0.862	0.006	0.926657	0.00702045
Ca	0.00178559	0.002	0.326	0.006	0.599	0.55	0	0.19	0.001	0.143	0.0019955	0.170182
Ba	0.0144761	0.029	0	0.001	0	0	0	0	0.013	0	0.00386086	0
Sum	4.98286	4.99	4.999	4.984	5	5.002	4.976	4.994	4.989	4.981	5.00459	5.00477
Mole percent
Ab	11.3599	10.9	66.5	12.2	39.5	44	7.5	78.4	11.1	84.8	6.8	82.4668
An	0.18255	0.2	32.7	0.7	59.6	55.1	0	19.2	0.1	14.5	0.2	16.8386
Or	86.9776	86	0.8	87	0.8	0.9	92.5	2.4	87.5	0.6	92.6	0.694635
Cn	1.47997	2.9	0	0.2	0	0	0	0	1.3	0	0.4	0
Note: Localities: C. Pt. – Christmas Point, Z. Pt. – Zircon Point, Mt. P. – Mount Pardoe. P – paragneiss; V - vein;
All Fe as FeO. Kfs – K –feldspar; Pl – plagioclase. Mg and Mn below detection limit except MnO rarely up to 0.02 wt%.
*One 20-second analysis only
