# Supplementary material for: Beryllium and Other Trace Elements in Paragneisses and Anatectic Veins of the Ultrahigh-Temperature Napier Complex, Enderby Land, East Antarctica: the Role of Sapphirine
Source: Oxford University Press journal article supplement (doi:10.1093/petrology/egi098), 2006-01-13
Supplement: egi098_Supplementary_Data.zip [file egi098_Supplementary_Data.zip › BRF_019_Appendix_5.xls]

## Sheet: appendix 5
Appendix 5. Selected analyses of sillimanite
Location	C. Pt.	C. Pt.	C. Pt.	C. Pt.	C. Pt.	Z. Pt.	Z. Pt.	Z. Pt.	Z. Pt.	Mt. P.	Mt. P.	Mc. I.	Mc. I.	Mc. I.
Rock	P	P	P	P	V	P	P	P	P	P	P	P	V	V
Sample	R31238	2292F	2292J	2292M	12263*	2234A1	2234A3	2234B	2234E	CC6	10503	R25628	R25628	2218A
Wt%
SiO2	36.79	36.52	36.73	36.698	36.586	36.72	36.71	36.7125	36.83	36.97	37.25	36.68	36.82	36.99
TiO2	0	0	0	0.026	0	0	0	0	0.06	0	0.03	0	0.02	0
Al2O3	61.99	61.57	61.93	61.848	61.532	62.7	62.08	62.7825	62.47	62.01	62	62.06	61.56	61.76
V2O3	0	0.04	0.03	0.028	0.02	0	0.08	0.035	0	0	0	0.1	0.16	0.13
Cr2O3	0	0	0	0	0.018	0	0.1	0.03	0	0	0	0.48	0.34	0.29
Fe2O3	0.45	0.83	0.71	0.493438	1.28472	0.27	0.25	0.258388	0.36	0.42	0.42	0.25	0.28	0.35
MnO	0	0.024	0	0	0.012	0	0	0.0175	0	0	0	0	0	0
MgO	0	0.012	0	0	0.01	0	0	0	0	0.02	0.02	0	0.02	0
Sum	99.23	99.0075	99.4	99.0934	99.4627	99.69	99.22	99.8359	99.72	99.42	99.72	99.57	99.19	99.52
ppm
Be	8.6	3.7	6.8	12	37	7.3	5.7	9.1	22.1	1.2	0.1	6	3.3	1.4
Formulae per 5 oxygens
Si	1.001	0.998	0.999	1.001	0.997044	0.995	0.999	0.993315	0.998	1.004	1.009	0.997	1.004	1.005
Ti	0	0	0	0.001	0	0	0	0	0.001	0	0.001	0	0	0
Al	1.989	1.984	1.986	1.989	1.97631	2.002	1.992	2.00202	1.994	1.985	1.978	1.987	1.978	1.978
V	0	0.001	0.001	0.001	0.000436992	0	0.002	0.00075925	0	0	0	0.002	0.003	0.003
Cr	0	0	0	0	0.000387835	0	0.002	0.000609666	0	0	0	0.01	0.007	0.006
Fe3+	0.009	0.017	0.014	0.01	0.0263466	0.005	0.005	0.00526095	0.007	0.009	0.009	0.005	0.006	0.007
Mn	0	0.00195586	0	0	0.000276991	0	0	0.000962516	0	0	0	0	0	0
Mg	0	0.00222251	0	0	0.000406264	0	0	0	0	0.001	0.001	0	0.001	0
Sum	3	3.00405	3	3.001	3.00121	3.002	3	3.00236	3	2.999	2.997	3.001	2.999	2.998
Note: Localities: C. Pt. – Christmas Point, Z. Pt. – Zircon Point, Mc. I. – McIntyre Island. P – paragneiss; V - pod or interboudin
pocket. All Fe as Fe2O3. Na2O and K2O mostly below detection, in a few cases, reach 0.02 wt%
*Prisms in sample 12263 are several centimeters across.
