# Supplementary material for: Beryllium and Other Trace Elements in Paragneisses and Anatectic Veins of the Ultrahigh-Temperature Napier Complex, Enderby Land, East Antarctica: the Role of Sapphirine
Source: Oxford University Press journal article supplement (doi:10.1093/petrology/egi098), 2006-01-13
Supplement: egi098_Supplementary_Data.zip [file egi098_Supplementary_Data.zip › BRF_019_Appendix_6.xls]

## Sheet: appendix 6
Appendix 6. Selected analyses of spinel
Locality	Z. Pt.	Z. Pt.	Mc. I.	Mc. I.
Rock	P	P	V	V
Sample	2234A3	2234B	R25628	2218A
SiO2	0.05	0.04	0	0.05
TiO2	0	0	0.23	0.42
Al2O3	60.36	61.37	54.46	58.91
V2O3	0.19	0.05	0.59	0.34
Cr2O3	0.48	0.13	6.99	2.52
Fe2O3	1.9	1.27	1.4	0
FeO	11.79	13.95	23.04	20.41
MnO	0.03	0	0	0.02
MgO	12.18	11.25	9.46	9.87
ZnO	11.39	11.28	3.51	5.47
NiO	0.24	―	―	0.82
Sum	98.62	99.34	99.68	98.82
ppm
Be	15	39	―	―
Formulae per 3 cations/4 oxygens
Si	0.001	0.001	0	0.001
Ti	0	0	0.005	0.009
Al	1.944	1.968	1.793	1.918
V	0.004	0.001	0.013	0.007
Cr	0.01	0.003	0.154	0.055
Fe3+	0.039	0.026	0.029	0
Fe2+	0.269	0.318	0.538	0.472
Mn	0.001	0	0	0
Mg	0.496	0.456	0.394	0.406
Zn	0.23	0.227	0.072	0.112
Ni	0.005	―	―	0.018
Be	0	0.001	―	―
Sum	3	3	3	2.999
XMg	0.648	0.59	0.423	0.463
Note: Localities: Z. Pt. – Zircon Point, Mc. I. – McIntyre Island. P – paragneiss;
V – interboudin pocket. Fe2+ and Fe3+ calculated from stoichiometry.
XMg = atom Mg/(Mg + Fe2+). Be - average over several grains. Sums include BeO.
