# Supplementary material for: Beryllium and Other Trace Elements in Paragneisses and Anatectic Veins of the Ultrahigh-Temperature Napier Complex, Enderby Land, East Antarctica: the Role of Sapphirine
Source: Oxford University Press journal article supplement (doi:10.1093/petrology/egi098), 2006-01-13
Supplement: egi098_Supplementary_Data.zip [file egi098_Supplementary_Data.zip › BRF_019_Appendix_7.xls]

## Sheet: appendix 7
Appendix 7. Selected analyses of cordierite
Locality	C. Pt.	Mt. P.	Mt. P.
Rock	V	P	V
Sample	12216	10513	10514
		wt%
SiO2	47.79	47.52	48.35
TiO2	0.01	0	0
Al2O3	31.16	31.96	32.38
FeO	3.53	3.51	2.71
MnO	0.07	0.01	0.01
MgO	11.88	11.92	12.38
CaO	0.09	0.03	0.02
Na2O	0.78	0.32	0.13
K2O	0.02	0.07	0.01
BeO	0.72	0.26	0.1
Sum	96.06	95.59	96.1
		Formulae per 18 O
Si	4.944	4.937	4.971
Al	3.799	3.913	3.923
Be	0.179	0.065	0.025
Al + Be	3.978	3.978	3.948
Ti	0.001	0	0
Fe	0.305	0.305	0.233
Mn	0.006	0.001	0.001
Mg	1.831	1.847	1.898
Sum vi	2.144	2.153	2.132
Ca	0.009	0.003	0.002
Na	0.157	0.063	0.026
K	0.003	0.009	0.002
Sum	0.17	0.075	0.03
Sum cat.	11.236	11.143	11.081
XMg	0.857	0.858	0.891
Note: Localities: C. Pt. – Christmas Point,
Z. Pt. – Zircon Point, Mt. P. – Mount Pardoe.
P – paragneiss, V – vein
All Fe as FeO. XMg = atom Mg/(Mg + Fe2+).
