# Supplementary material for: Beryllium and Other Trace Elements in Paragneisses and Anatectic Veins of the Ultrahigh-Temperature Napier Complex, Enderby Land, East Antarctica: the Role of Sapphirine
Source: Oxford University Press journal article supplement (doi:10.1093/petrology/egi098), 2006-01-13
Supplement: egi098_Supplementary_Data.zip [file egi098_Supplementary_Data.zip › E_Appendix_8.xls]

## Sheet: appendix 8
Appendix 8. Results of repeated measurements of standards for Be, B amd Li using secondary ion mass spectroscopy (February, 2000 - May, 2003)
Material	glass	glass	glass	glass	glass	glass	glass	glass	glass	prismatine	prismatine	prismatine	khmaralite	khmaralite	surinamite	surinamite
Sample	gl 057	gl 111	gl 333	gl 057	gl 111	gl 333	gl 057	gl 111	gl 333	112233	BM1940,39	BM1940,39	2234L	2234L	2292B	2292B
Constituent	BeO	BeO	BeO	B2O3	B2O3	B2O3	Li2O	Li2O	Li2O	Be	Be	Li	B	Li	B	Li
Given amount	0.57	1.11	3.33	0.49	0.49	0.48	0.74	0.74	0.73	NA	79.2705	883	NA	NA	NA	NA
Measure	wt%	wt%	wt%	wt%	wt%	wt%	wt%	wt%	wt%	ppm	ppm	ppm	ppm	ppm	ppm	ppm
n	28	29	22	8	10	9	7	8	8	4	2	2	13	11	13	11
Average	0.710138	1.39756	3.98634	0.620741	0.612498	0.570059	0.981432	0.955516	0.899477	20.054	80.6566	1246.24	167.721	55.1659	13.1535	15.2329
Stdev	0.0541886	0.11009	0.312401	0.0432699	0.0551964	0.0348118	0.0595691	0.0762806	0.0598742	0.806727	NA	NA	75.6633	16.7159	2.11643	6.5136
Stdev/Ave (%)	0.0763072	0.0787729	0.0783678	0.0697068	0.0901168	0.061067	0.0606961	0.0798318	0.0665655	0.0402278	NA	NA	0.451125	0.303011	0.160902	0.427601
Measured/given	1.24586	1.25906	1.1971	1.26682	1.25	1.18762	1.32626	1.29124	1.23216	NA	1.01749	1.41137	NA	NA	NA	NA
Note: NA - not available or not calculated. Sources of given amounts: glasses by ICP-AES (Evensen, 1997; Evensen & London, 2002, 2003; Evensen et al., 1999;
Evensen, personal communication); prismatine by atomic absorption (Grew et al., 1990).
